# Supplementary material
Source: PubMed Central journal article supplement (PMC7653541)
Supplement: jamapediatr-e203579-s001.pdf [file jamapediatr-e203579-s001.pdf]

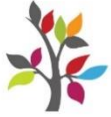

This supplement contains the following item:

A translation\* of the original and final protocol (no changes done),  
including statistical analysis methods described in the end of the  
protocol (page 18).

\* The original protocol was not in English.

Study Protocol:

**RAM Cannula vs. Binasal Prongs/Mask for Delivering NIPPV in  
Preterm Infants :Non-Inferiority, Randomized, Controlled Trial**

Protocol Version: 1

|                                                                                   |    |
|-----------------------------------------------------------------------------------|----|
| Funding: None                                                                     | 17 |
| Principal Investigator: Dr. Ori Hochwald, Rambam medical center,<br>Haifa, Israel | 18 |
| Date: Dec 26 <sup>th</sup> 2016                                                   | 19 |

## Study summary - flow diagram

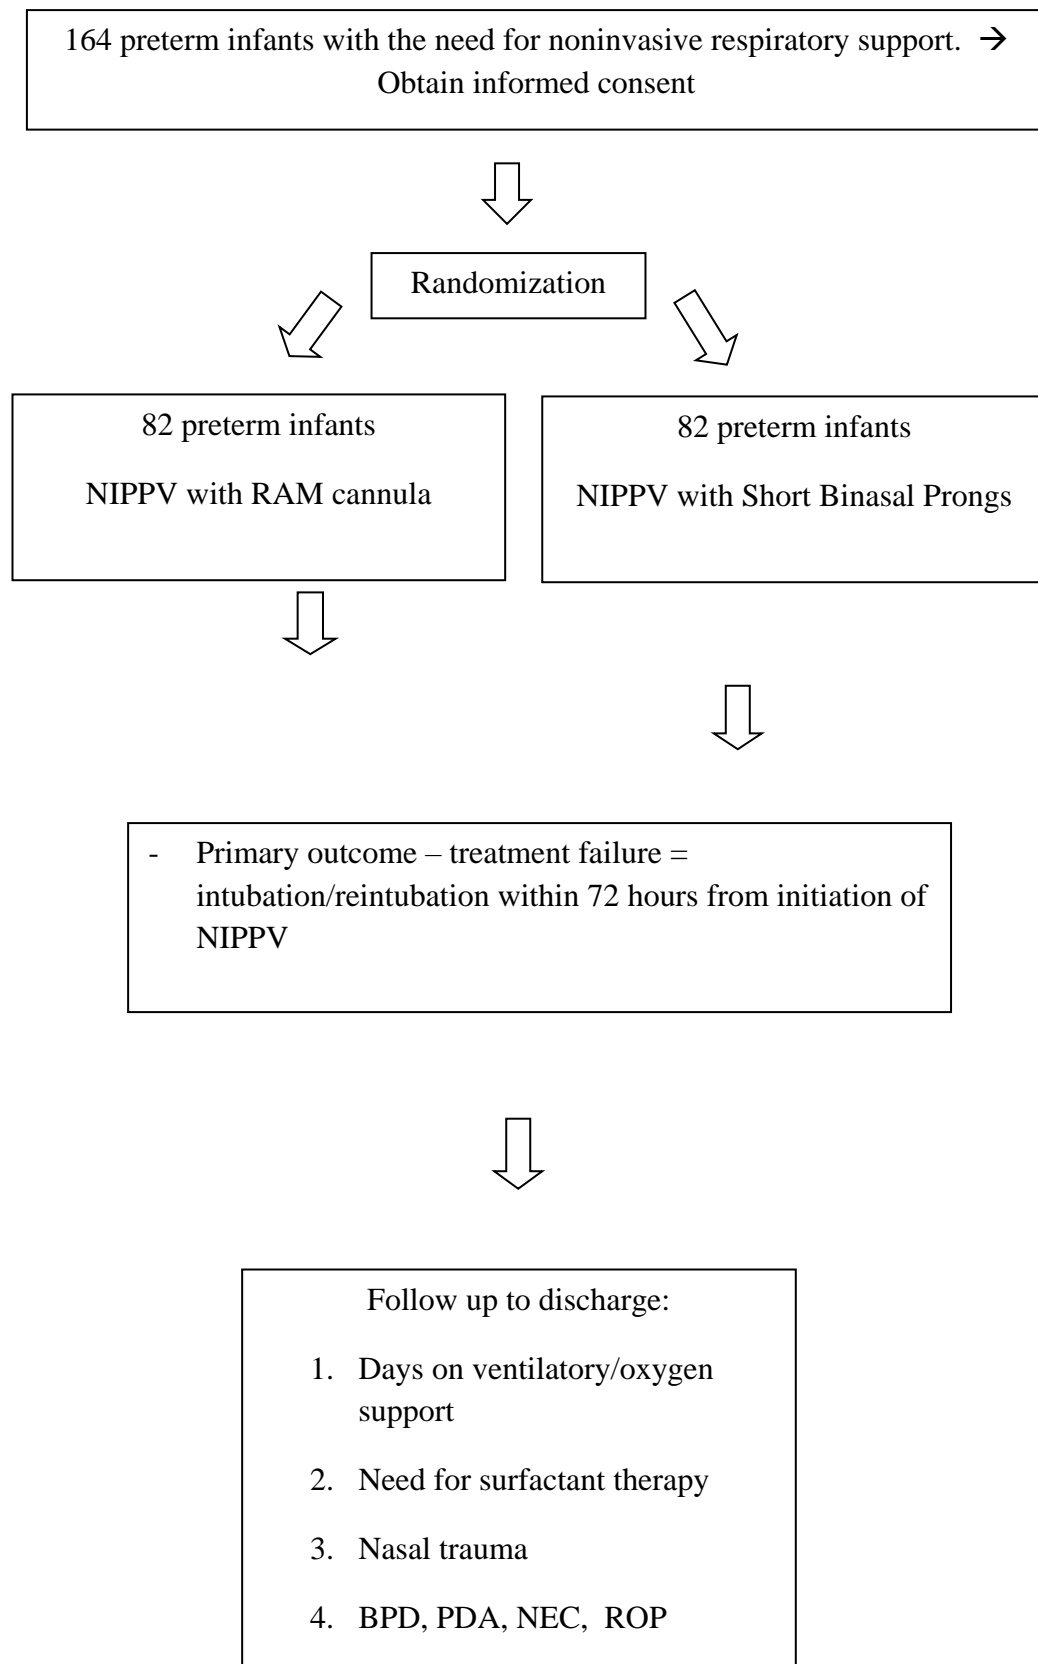

## 1. Synopsis

---

|                                     |           |    |
|-------------------------------------|-----------|----|
|                                     |           | 49 |
| <b>TABLE OF CONTENT</b>             |           | 50 |
| <b>1. Synopsis .....</b>            | <b>4</b>  | 51 |
| <b>2. Introduction.....</b>         | <b>7</b>  | 52 |
| <b>3. Methods.....</b>              | <b>9</b>  | 53 |
| 3.1 Design.....                     | 9         | 54 |
| 3.2 Ethics.....                     | 9         | 55 |
| 3.3 Subjects.....                   | 9         | 56 |
| 3.4 Subgroups.....                  | 9         | 57 |
| 3.5 Inclusion criteria.....         | 10        | 58 |
| 3.6 Exclusion criteria.....         | 10        | 59 |
| 3.7 Randomization.....              | 11        | 60 |
| 3.8 Interventions.....              | 11        | 61 |
| 3.9 Outcomes.....                   | 14        | 62 |
| 3.10 Safety.....                    | 16        | 63 |
| 3.11 Ethical Aspect.....            | 16        | 64 |
| <b>4. Statistical Analysis.....</b> | <b>18</b> | 65 |
| <b>5. References.....</b>           | <b>20</b> | 66 |
|                                     |           | 67 |
|                                     |           | 68 |
|                                     |           | 69 |
|                                     |           | 70 |

|                        |                                                                                                                                                                                                                                                                                                                                                                                                                                                                                                                                                                                                                                                                   |
|------------------------|-------------------------------------------------------------------------------------------------------------------------------------------------------------------------------------------------------------------------------------------------------------------------------------------------------------------------------------------------------------------------------------------------------------------------------------------------------------------------------------------------------------------------------------------------------------------------------------------------------------------------------------------------------------------|
| Full title             | RAM Cannula vs. Binasal Prongs/Mask for Delivering NIPPV in Preterm Infants :Non-Inferiority, Randomized, Controlled Trial                                                                                                                                                                                                                                                                                                                                                                                                                                                                                                                                        |
| Principal investigator | Dr. Hochwald Ori                                                                                                                                                                                                                                                                                                                                                                                                                                                                                                                                                                                                                                                  |
| Short background       | <p>Thanks to ease of use, perceived patient comfort and reduced nasal trauma Ram cannula use has gained increasing popularity and was adopted as default by many NICUs without strong evidence supporting its use. In contrast, there are many other NICUs that completely refrain from using Ram cannula in concern that this long thin interface delivers reduced and suboptimal support.</p> <p>We hypothesized that using Ram cannula would be inferior to short prongs or mask in preterm infants who require noninvasive ventilation for the primary treatment of RDS or post extubation and would result in a higher rate of endotracheal ventilation.</p> |
| Primary outcome        | The need for endotracheal ventilation within 72 hours after initiation of NIPPV, i.e. "Treatment failure".                                                                                                                                                                                                                                                                                                                                                                                                                                                                                                                                                        |
| Secondary outcomes     | <ul style="list-style-type: none"> <li>• Failure between 72 hours and 7 days after initiation of NIPPV</li> <li>• Nasal trauma</li> <li>• The need for surfactant</li> </ul>                                                                                                                                                                                                                                                                                                                                                                                                                                                                                      |

|                    |                                                                                                                                                                                                                                                                                                                                                                                                                                      |
|--------------------|--------------------------------------------------------------------------------------------------------------------------------------------------------------------------------------------------------------------------------------------------------------------------------------------------------------------------------------------------------------------------------------------------------------------------------------|
|                    | <ul style="list-style-type: none"> <li>• Complications of prematurity (including bronchopulmonary dysplasia, patent ductus arteriosus, necrotizing enterocolitis (bell's staging 2-3), sepsis, intraventricular hemorrhage and periventricular leukomalacia</li> <li>• Air leaks.</li> <li>• Length of invasive and noninvasive respiratory support</li> <li>• Time to full feeds and</li> <li>• Length of hospital stay.</li> </ul> |
| Design             | Dual center, randomized, controlled, non-inferiority trial.                                                                                                                                                                                                                                                                                                                                                                          |
| Patients           | Premature infants born in gestational age between 24 <sup>0</sup> and 33 <sup>6</sup>                                                                                                                                                                                                                                                                                                                                                |
| Inclusion criteria | <p>Need for noninvasive ventilatory support either</p> <ul style="list-style-type: none"> <li>• For initial treatment of RDS, <u>or</u></li> <li>• Post first extubation after birth.</li> </ul> <p>Written informed consent. Antepartum consent should be sought when possible, otherwise parents can consent at the earliest opportunity within 4 hours after NIPPV is initiated.</p>                                              |
| Exclusion criteria | <p>Significant morbidity apart from RDS including:</p> <ul style="list-style-type: none"> <li>• Cardiac disease (not including patent ductus</li> </ul>                                                                                                                                                                                                                                                                              |

|                             |                                                                                                                                                                                                                                                                                                                                                                  |
|-----------------------------|------------------------------------------------------------------------------------------------------------------------------------------------------------------------------------------------------------------------------------------------------------------------------------------------------------------------------------------------------------------|
|                             | <p>arteriosus)</p> <ul style="list-style-type: none"> <li>• Congenital malformation</li> <li>• Cardiovascular or respiratory instability because of sepsis, anemia or severe intra-ventricular hemorrhage.</li> </ul> <p>Written consent not provided within 4 hours from NIPPV initiation</p>                                                                   |
| Devices (type of cannula)   | <p>- Ram (Neotech, Valencia, CA)</p> <p>- Short binasal prongs - including the currently used devices in the two units participating in the study:</p> <ul style="list-style-type: none"> <li>• (INCA Nasal Cannula [CooperSurgical, Inc, Trumbull, CT] <u>or</u></li> <li>• EasyFlow prongs or mask [Fritz Stephan GmbH]).</li> </ul>                           |
| Number of patients required | 164, 82 in each group                                                                                                                                                                                                                                                                                                                                            |
| Recruiting centers          | <p>Rambam medical center, Haifa, Israel</p> <p>Bnai Zion medical center, Haifa, Israel</p>                                                                                                                                                                                                                                                                       |
| Non inferiority analysis    | <p>We prespecified a noninferiority margin for Ram cannula of 15% above the failure (intubation within 72 hours) rate for short prongs or mask. Using Ram cannula will be considered noninferior to using SPM if the upper limit of the two-sided 95% confidence interval is less than 15% and the lower limit of the 95% confidence interval is below zero.</p> |

|                      |                                                                                                                                                  |
|----------------------|--------------------------------------------------------------------------------------------------------------------------------------------------|
| Funding              | None                                                                                                                                             |
| Conflict of interest | None                                                                                                                                             |
| Trial Registration   | Clinicaltrials.gov: NCT03081611<br><a href="https://clinicaltrials.gov/ct2/show/NCT03081611">https://clinicaltrials.gov/ct2/show/NCT03081611</a> |



## 2. Introduction

In the recent years, in an effort to avoid endotracheal intubation and invasive mechanical ventilation, there has been an increase in the use of noninvasive ventilation in very low birth (VLBW) preterm infants as the initial respiratory support after birth or after extubation <sup>1,2</sup>.

Different interfaces are available for applying noninvasive ventilation. The commonly used interfaces include short binasal prongs, nasal masks and Ram cannula. The different properties of these interfaces may affect the pressure and volume transmission, which may have influence on clinical outcomes <sup>3</sup>.

The most commonly used interfaces, the standard short binasal prongs and masks, are located at the end of normal caliber ventilator tubing. Unfortunately, short nasal prongs and masks are occasionally associated with discomfort and pressure-related nasal injury <sup>4</sup>. The Ram cannula is made of softer material with a long and narrow tubing for transmitting the pressure to thin walled prongs. This results in a perceived ease of use, comfort and less nasal trauma <sup>5</sup>. However, there is concern that this long thin interface delivers reduced and suboptimal pressure and support compared with the short nasal prongs and masks <sup>6-8</sup>. Despite its widespread use <sup>9</sup>, the clinical efficacy of the Ram cannula was not thoroughly studied. To adopt this method for clinical

practice in preterm infants it has to be shown to be non-inferior to binasal prongs/mask interfaces.

The most important factor in noninvasive ventilation of premature infants is supporting the functional residual capacity (FRC) with continuous positive airway pressure (CPAP). This might be the reason for the advantage of NCPAP over HFNC in these infants<sup>10,11</sup>. While both NCPAP and NIPPV support the FRC with NCPAP, different studies showed NIPPV to be either as good as or superior to NCPAP<sup>12,13</sup>. Thus, we will use in this our study the NIPPV as a preferred mode, and evaluate the two interfaces using it.

There are a limited number of studies assessing Ram cannula efficacy in delivering noninvasive ventilation, most of them are bench testing using lung models or focused on measurements of the applied pressures. Those studies used the manufacturer recommendation for prong occlusion of 60–80% of the nares space<sup>6</sup>. Gerdes et al measured mean airway pressure (MAP) delivered through the Ram Cannula as a function of percent nares occlusion in a simulated lung model. With 60–80% nares occlusion, overall delivered MAPs were around 60% of the set CPAP levels. With 100% occlusion the MAPs were within  $\pm 0.5$  cmH<sub>2</sub>O of the set CPAP levels<sup>7</sup>. In summary, studies suggest that using Ram cannula would be potentially more efficacious once lower leak around the cannula and higher ventilatory set pressures are used<sup>3,6–8</sup>. We

found no published randomized controlled trial that compared NIPPV using 112  
Ram cannula and short nasal prongs for the initial treatment of RDS. 113

Compared to short prongs, the RAM cannula is made of softer material 114  
and is less cumbersome, resulting in a perceived more comfort and less nasal 115  
trauma <sup>5</sup>. In their study on noninvasive ventilation, Nzegwu et al had 17.9% of 116  
nasal breakdown using short prongs. In case of nasal breakdown they 117  
switched to Ram cannula, and showed no new instances of nasal breakdown 118  
or injury with its use <sup>5</sup>. 119

We hypothesized that because of its long thin design, using Ram 120  
cannula would be inferior to binasal prongs/mask in preterm infants who 121  
require nasal support and would result in a higher rate of endotracheal 122  
ventilation. 123

In this randomized, controlled, non-inferiority study, we aim to 124  
compare the ability to prevent intubation in preterm infants in need for 125  
ventilatory support for the initial treatment of RDS or post extubation by using 126  
nasal intermittent positive pressure ventilation (NIPPV) with either Ram 127  
cannula or short binasal prongs/mask (SPM) interfaces. 128

129

|                                                                                             |     |
|---------------------------------------------------------------------------------------------|-----|
| <b>3. Methods</b>                                                                           | 130 |
|                                                                                             | 131 |
| <i>3.1 Design</i>                                                                           | 132 |
| Randomized prospective, open, controlled, non-inferiority dual-center                       | 133 |
| study was conducted in the tertiary neonatal intensive care units of Rambam                 | 134 |
| Medical Center and Bnai Zion Medical Center in Haifa, Israel.                               | 135 |
| Blinding of the intervention is impossible in this study.                                   | 136 |
|                                                                                             | 137 |
| <i>3.2 Ethics</i>                                                                           | 138 |
| This trial was approved by the local ethics committee and was entered                       | 139 |
| to ClinicalTrials.gov database, registration number NCT03081611.                            | 140 |
|                                                                                             | 141 |
| <i>3.3 Subjects</i>                                                                         | 142 |
| premature infants born in gestational age between 24 <sup>0</sup> and 33 <sup>6</sup> weeks | 143 |
| as assessed by the obstetrical team from dating of last menstrual period or                 | 144 |
| ultrasound                                                                                  | 145 |
|                                                                                             | 146 |
| <i>3.4 Subgroups:</i> The study population is divided into two groups:                      | 147 |

|                                                                                   |     |
|-----------------------------------------------------------------------------------|-----|
| • <u>The initial-treatment group</u> - infants that needs noninvasive ventilation | 148 |
| during the first 7 days of life without prior invasive ventilation in the         | 149 |
| NICU.                                                                             | 150 |
| • <u>The post-extubation group</u> includes infants that needed noninvasive       | 151 |
| ventilation during the first 28 days of life after any period of                  | 152 |
| endotracheal ventilation in the NICU. The latter group will includ infants        | 153 |
| from the initial-treatment group that are ventilated after the initial            | 154 |
| treatment with NIPPV. These infants will keep the same interface                  | 155 |
| according to the initial allocation.                                              | 156 |
|                                                                                   | 157 |
| <i>3.5 Inclusion criteria</i>                                                     | 158 |
| 1. Need for noninvasive ventilatory support:                                      | 159 |
| • For initial treatment all including:                                            | 160 |
| ○ Clinical RDS including tachypnea, apneic episodes,                              | 161 |
| grunting and/or retractions                                                       | 162 |
| ○ Need for more than "low flow" ( $\leq 2$ lpm) for keeping                       | 163 |
| saturation $> 90\%$ and/or $pCO_2 \leq 60$ mmHg.                                  | 164 |
| ○ The decision on the need for ventilatory support will be                        | 165 |
| assessed by the attending clinician.                                              | 166 |
| • Post first extubation after birth – all infants will be treated with            | 167 |
| NIPPV.                                                                            | 168 |

|                                                                                                                                                                                                                                                                                               |                                 |
|-----------------------------------------------------------------------------------------------------------------------------------------------------------------------------------------------------------------------------------------------------------------------------------------------|---------------------------------|
| 2. Both parents of all participating infants will provide written informed consent. Antepartum consent will be sought when possible. If antepartum consent is not sought, parents will be approached and ask for consent at the earliest opportunity within 4 hours after NIPPV is initiated. | 169<br>170<br>171<br>172<br>173 |
|                                                                                                                                                                                                                                                                                               | 174                             |
| <i>3.6 Exclusion criteria</i>                                                                                                                                                                                                                                                                 | 175                             |
| 1. Significant morbidity apart from RDS including:                                                                                                                                                                                                                                            | 176                             |
| • Cardiac disease (not including patent ductus arteriosus)                                                                                                                                                                                                                                    | 177                             |
| • Congenital malformation                                                                                                                                                                                                                                                                     | 178                             |
| • Cardiovascular or respiratory instability because of sepsis, anemia or severe intra-ventricular hemorrhage.                                                                                                                                                                                 | 179<br>180                      |
| 2. Written consent not provided within 4 hours from NIPPV initiation.                                                                                                                                                                                                                         | 181                             |
|                                                                                                                                                                                                                                                                                               | 182                             |
|                                                                                                                                                                                                                                                                                               | 183                             |

### 3.7 Randomization 184

Pre-randomization stratification will be done by groups (initial- 185  
 treatment and post-extubation) and by BW ( $< 1250$  gr and  $\geq 1250$  gr) in each 186  
 study center, separately. Multiple births will be randomized individually. The 187  
 randomization sequence is computer generated with block size of 4. A note 188  
 with the type of the assigned interfaces (Ram cannula or short prongs/mask) 189  
 will be provided in consecutively numbered, opaque envelopes. 190

191

### 3.8 Interventions 192

Endotracheal intubation criteria in the delivery room are <sup>14</sup>: 193

- Heart rate  $\leq 100$  beats/min despite after noninvasive positive pressure 194  
 applied 195
- Insufficient spontaneous respiratory 196
- Marked and increasing dyspnea. 197

198

Early nasal respiratory support with NIPPV will be initiated in any spontaneous 199

breathing premature infant meeting the inclusion criteria. 200

201

Exogenous surfactant (200 mg/kg for the 1st dose, 100 mg/kg for the 2nd dose, 1 to 2 doses as needed, Curosurf; Chiesi Farmaceutici, Parma, Italy) will be given only as rescue therapy.

### *Study intervention*

Eligible infants will be randomly assigned to NIPPV with either Ram Cannula (Neotech, Valencia, CA) or short binasal prongs (INCA Nasal Cannula [CooperSurgical, Inc, Trumbull, CT] or EasyFlow prongs [Fritz Stephan GmbH]). The study protocol allows use of EasyFlow mask (Fritz Stephan GmbH) or alternating between short prongs and mask in cases of nasal trauma or for prevention of nasal trauma per unit protocol. Both prongs and mask are referred to as short prongs/mask interface (SPM) for the study purposes. No cross over between Ram cannula and short prongs/mask allowed in the study.

The Ram Canula prongs size will be selected so it will fill approximately 80% of nares. The short prongs size will be selected as per the manufacturer's instructions so it will fill close to 100% of nares without causing local pressure. If used, the mask size will be chosen as per the manufacturer's instructions.

The study team is encouraged to obtain an antepartum consent. If not approached before NIPPV is initiated, NIPPV will be initiated with Ram cannula, and once parents gave their consent, treatment will continue with an



interface according to randomization allocation. Parents will be approached 222  
 and ask for consent at the earliest opportunity within 4 hours after NIPPV is 223  
 initiated. 224

NIPPV will be administered using Leoni (Heinen&Löwenstein, Bad Ems, 226  
 Germany) or SLE 5000 (SLE, Croydon, UK) ventilators on SIMV mode. The 227  
 ventilators will be managed by the attending neonatologist according to the 228  
 following initial and weaning approach. 229

- Initial NIPPV settings: 230
  - Peak inspiratory pressure (PIP) of 14-18 cmH<sub>2</sub>O (according to chest 231  
 excursion) 232
  - Positive end expiratory pressure (PEEP) of 6 cmH<sub>2</sub>O 233
  - Respiratory rate (RR) of 10-30 breaths per minute (BPM) 234
  - Inspiratory time (Ti) of 0.3-0.35 seconds 235
  - Saturation targets were 90-94%. 236
- Settings limits allowed are 237
  - PIP of 10-24 cmH<sub>2</sub>O 238
  - PEEP of 5-7 cmH<sub>2</sub>O 239
  - RR of 8-40 BPM 240
- Weaning from NIPPV to no support or to low flow (i.e. ≤2 LPM) will be 241  
 considered if: 242

|                                                                                               |     |
|-----------------------------------------------------------------------------------------------|-----|
| ○ There was clinical improvement and                                                          | 243 |
| ○ Fraction of inspired oxygen of 0.3 or lower                                                 | 244 |
| ○ PIP $\leq$ 16 cmH <sub>2</sub> O                                                            | 245 |
| ○ PEEP $\leq$ 6 cmH <sub>2</sub> O                                                            | 246 |
| ○ RR $\leq$ 20 BPM.                                                                           | 247 |
|                                                                                               | 248 |
| All infants will be evaluated at least daily.                                                 | 249 |
|                                                                                               | 250 |
| Infants with GA<32 will receive caffeine for apnea prevention starting in the 1 <sup>st</sup> | 251 |
| day of life. Apneic infants with GA $\geq$ 32 will receive caffeine as per the attending      | 252 |
| clinician's discretion.                                                                       | 253 |
|                                                                                               | 254 |
| Surfactant administration using either MIST or INSURE techniques or after                     | 255 |
| intubation according to clinician's discretion and according to the unit                      | 256 |
| protocol.                                                                                     | 257 |
|                                                                                               | 258 |
| Using high flow nasal cannula (HFNC) will be done only in cases of significant                | 259 |
| nasal trauma during NIPPV.                                                                    | 260 |
|                                                                                               | 261 |

|                                                                                                                                                                           |     |
|---------------------------------------------------------------------------------------------------------------------------------------------------------------------------|-----|
| Other aspects of neonatal care will be provided according to the routine unit protocols.                                                                                  | 262 |
|                                                                                                                                                                           | 263 |
|                                                                                                                                                                           | 264 |
| <i>3.9 Outcomes</i>                                                                                                                                                       | 265 |
| <b>The primary outcome:</b> Treatment failure within 72 hours after initiation of NIPPV, i.e. the need for endotracheal ventilation.                                      | 266 |
|                                                                                                                                                                           | 267 |
| • intubation and ventilated criteria: clinical deterioration (increased respiratory distress) accompanied by at least one of the following or worsening of the following: | 268 |
|                                                                                                                                                                           | 269 |
|                                                                                                                                                                           | 270 |
| ○ pH<7.20 and pCO <sub>2</sub> > 60 mm Hg                                                                                                                                 | 271 |
| ○ Oxygen saturation by pulse-oximetry (SpO <sub>2</sub> )<90% on FiO <sub>2</sub> >50%,                                                                                   | 272 |
|                                                                                                                                                                           | 273 |
| ○ Recurrent significant apnea requiring repeated stimulation or bag-and-mask ventilation despite the use of caffeine and excluding technical problems                     | 274 |
|                                                                                                                                                                           | 275 |
|                                                                                                                                                                           | 276 |
| ○ All of the above despite allowing setting on NIPPV up to PIP=24 cmH <sub>2</sub> O, PEEP= 7 cmH <sub>2</sub> O and RR of 40.                                            | 277 |
|                                                                                                                                                                           | 278 |
| • Moderate to severe nasal trauma within 72 hours, requiring change of interface will be also considered as a failure criterion.                                          | 279 |
|                                                                                                                                                                           | 280 |
| • Surfactant administration via the INSURE technique (intubation-surfactant-extubation immediately after surfactant administration) or                                    | 281 |
|                                                                                                                                                                           | 282 |

|                                                                           |     |
|---------------------------------------------------------------------------|-----|
| the MIST (minimally invasive surfactant therapy) via a thin catheter will | 283 |
| <u>not</u> considered a failure of the NIPPV treatment.                   | 284 |
|                                                                           | 285 |
| <b>Secondary outcomes</b> included:                                       | 286 |
| • Treatment failure between 72 hours and 7 days after initiation of       | 287 |
| NIPPV.                                                                    | 288 |
| • The reason for treatment failure                                        | 289 |
| • Nasal trauma: graded as mild- persistent erythema, moderate-            | 290 |
| superficial ulceration and severe- necrosis.                              | 291 |
| • The need for surfactant                                                 | 292 |
| • Complications of prematurity including:                                 | 293 |
| ○ Bronchopulmonary dysplasia - defined as the need for                    | 294 |
| oxygen therapy or positive pressure (CPAP or NIPPV) or                    | 295 |
| high flow nasal cannula of >2LPM at 36 weeks gestation                    | 296 |
| ○ Patent ductus arteriosus – diagnosed by                                 | 297 |
| echocardiography by cardiologist,                                         | 298 |
| ○ Necrotizing enterocolitis, bell's staging 2-3 – diagnosed               | 299 |
| by clinical signs and x-ray reviewed by pediatric                         | 300 |
| radiologist                                                               | 301 |
| ○ Culture proven sepsis                                                   | 302 |

|                                                           |     |
|-----------------------------------------------------------|-----|
| ○ Intraventricular hemorrhage (any grade and grades 3-4)  | 303 |
| and/or periventricular leukomalacia diagnosed by cranial  | 304 |
| ultrasound reviewed by pediatric radiologist. Routine     | 305 |
| ultrasound schedule will be 3, 14 and 28 days and before  | 306 |
| discharge if older than 60 days at discharge.             | 307 |
| • Complications related to ventilation (i.e. air leaks).  | 308 |
| • Length of invasive and noninvasive respiratory support. | 309 |
| • Time to "full feeds", i.e 140 ml/k/day.                 | 310 |
| • Length of hospital stay.                                | 311 |
| All data will be entered to computerized CRF.             | 312 |
|                                                           | 313 |

|                                                                                   |     |
|-----------------------------------------------------------------------------------|-----|
| <i>3.10 Safety</i>                                                                | 314 |
| All adverse events will be reported to the ethical committee and to the           | 315 |
| principal investigator (Dr. Ori Hochwald) according to the rules of Good          | 316 |
| Clinical Practice (GCP). Definitions:                                             | 317 |
| <b>Adverse event (AE)</b>                                                         | 318 |
| Any harmful event occurring in a person who is engaged in biomedical              | 319 |
| research, whether or not it is related to the research or the product to which    | 320 |
| the research relates.                                                             | 321 |
| <b>Adverse reaction to a medical device (MD)</b>                                  | 322 |
| Any harmful and unwanted reaction to a medical device or any incident that        | 323 |
| could have caused such a reaction if an appropriate action had not been           | 324 |
| taken, in a person who is engaged for research or in the user of the medical      | 325 |
| device or any effect related to a failure or alteration of an in vitro diagnostic | 326 |
| medical device that is harmful to the health of a person who is suitable for      | 327 |
| research.                                                                         | 328 |
| <b>Serious event or adverse reaction</b>                                          | 329 |
| Any adverse event or reaction that results in death, endangers the life of the    | 330 |
| person                                                                            | 331 |

|                                                                                   |     |
|-----------------------------------------------------------------------------------|-----|
| undergoing research, requires hospitalization or prolongation of                  | 332 |
| hospitalization, causes                                                           | 333 |
| significant or lasting disability or handicap, or results in a congenital anomaly | 334 |
| or                                                                                | 335 |
| malformation, and in the case of the drug, at any dose administered.              | 336 |
| <b>Unexpected adverse reaction for research involving a medical device</b>        | 337 |
| Any adverse reaction whose nature, severity or course does not correspond to      | 338 |
| the                                                                               | 339 |
| information contained in the instructions or instructions for use when the        | 340 |
| medical device is CE marked, and in the investigator's brochure when it is not    | 341 |
| so marked.                                                                        | 342 |
|                                                                                   | 343 |

### 3.11 Ethical Aspect 344

Parents of children will be informed in full and fair manner, in 345  
 understandable terms, of the objectives and constraints of the research, the 346  
 possible risks involved, the necessary surveillance and safety measures, their 347  
 rights to refuse to participate in the research or the possibility of withdrawing 348  
 at any time. All this information is contained in an information and consent 349  
 form given to the parents. 350

In order to ensure medical confidentiality and data protection, written 351  
 consent forms and un-named clinical data will be retained by the investigator 352  
 for a period of fifteen years after the end of the trial. All trial data will be 353  
 computerized and kept confidential. As patients' names are kept secret, 354  
 documentation and clinical data will be identified only by study number. 355

The data will be entered to computerized CRF. 356

No funding or conflict of interest are present in this study. 357

358



#### 4. Statistical Analysis

359

The statistical analysis will be carried out by prof. A Riskin and his  
statistical team (Bnai Zion medical center Haifa, Israel).

360

361

The statistical analysis will be carried out with "intention to treat", i.e.  
the intervention considered in the analysis will be the one resulting from  
randomization.

362

363

364

Based on our units' previous data we estimate that treatment failure  
within 72 hours after NIPPV initiation would be ~ 18% using short  
prongs/mask (SPM). We prespecified a noninferiority margin for Ram cannula  
of 15% above the failure (intubation within 72 hours) rate for short prongs or  
mask. This was considered clinically significant and based on previous studies.  
<sup>11,15</sup> Using Ram cannula will be considered noninferior to using SPM if the  
upper limit of the two-sided 90% confidence interval is less than 15% and the  
lower limit of the 90% confidence interval was below zero <sup>16</sup>.

365

366

367

368

369

370

371

372

Using Significance level (p value) of 5% and 80% power, a sample of  
164 infants is required. The calculation done by power calculator for binary  
outcome noninferiority trial. Available from:  
<https://www.sealedenvelope.com/power/binary-noninferior/> [Accessed Mon  
Oct 24 2016]. We aim to include 85-90 infants in each arm in case of losts to  
follow up.

373

374

375

376

377

378

The variables will be summarized by their mean (standard deviation), 379  
median (range) or percentage depending on the type of variable. 380

For comparing the binomial proportions in failure rate for non- 381  
inferiority based on the score test of Farrington and Manning (1990) we will 382  
use SAS 9.4 statistical software with non-inferiority margin of 0.15. We will also 383  
compare failure rate (primary outcome) using Chi square analysis. Although 384  
theoretically not needed for non-inferiority description, Chi-square is more 385  
often used by clinicians and probably therefore it was mentioned in previously 386  
published non-inferiority trials.<sup>10</sup> 387

Chi-square test will be used to compare dichotomous variables. 388  
Student's t-test and Mann–Whitney U test will be used for normal and 389  
abnormal distribution, respectively, to compare continuous variables. We will 390  
use Shapiro-Wilks test to assess normal distribution of the results. Analyses were 391  
performed Using SPSS for Windows v. 19.0 (SPSS Inc, Chicago, IL). A p-value of 392  
< 0.05 will be considered statistically significant. 393

394

395

396

|                                                                                                                                                                                                                                                                                |                          |
|--------------------------------------------------------------------------------------------------------------------------------------------------------------------------------------------------------------------------------------------------------------------------------|--------------------------|
| <b>5. REF</b>                                                                                                                                                                                                                                                                  | 397                      |
| 1. Bhandari V. Noninvasive respiratory support in the preterm infant. <i>Clin Perinatol.</i> 2012. doi:10.1016/j.clp.2012.06.008                                                                                                                                               | 398<br>399               |
| 2. LeVan JM, Brion LP, Wrage LA, et al. Change in practice after the surfactant, positive pressure and oxygenation randomised trial. <i>Arch Dis Child Fetal Neonatal Ed.</i> 2014. doi:10.1136/archdischild-2014-306057                                                       | 400<br>401<br>402        |
| 3. Mukerji A, Belik J. Neonatal nasal intermittent positive pressure ventilation efficacy and lung pressure transmission. <i>J Perinatol.</i> 2015;35(9):716-719. doi:10.1038/jp.2015.61                                                                                       | 403<br>404<br>405        |
| 4. Imbulana DI, Manley BJ, Dawson JA, Davis PG, Owen LS. Nasal injury in preterm infants receiving non-invasive respiratory support: a systematic review. <i>Arch Dis Child Fetal Neonatal Ed.</i> 2018;103(1). doi:10.1136/archdischild-2017-313418                           | 406<br>407<br>408<br>409 |
| 5. Nzegwu NI, Mack T, DellaVentura R, et al. Systematic use of the RAM nasal cannula in the Yale–New Haven Children’s Hospital Neonatal Intensive Care Unit: a quality improvement project. <i>J Matern Neonatal Med.</i> 2015;28(6):718-721. doi:10.3109/14767058.2014.929659 | 410<br>411<br>412<br>413 |
| 6. Bailes SA, Firestone KS, Dunn DK, McNinch NL, Brown MF, Volsko TA. Evaluating the Effect of Flow and Interface Type on Pressures Delivered With Bubble CPAP in a Simulated Model. <i>Respir Care.</i> 2016;61(3):333-                                                       | 414<br>415<br>416        |

339. doi:10.4187/respcare.04251 417
7. Gerdes JS, Sivieri EM, Abbasi S. Factors influencing delivered mean airway pressure during nasal CPAP with the RAM cannula. *Pediatr Pulmonol.* 2016;51(1):60-69. doi:10.1002/ppul.23197 418  
419  
420
8. Iyer NP, Chatburn R. Evaluation of a Nasal Cannula in Noninvasive Ventilation Using a Lung Simulator. *Respir Care.* 2015;60(4):508-512. doi:10.4187/respcare.03560 421  
422  
423
9. Drescher GS, Hughes CW. Comparison of Interfaces for the Delivery of Noninvasive Respiratory Support to Low Birthweight Infants. *Respir Care.* 2018;63:1197-1206. doi:10.4187/respcare.05978 424  
425  
426
10. Roberts CT, Owen LS, Manley BJ, et al. Nasal high-flow therapy for primary respiratory support in preterm infants. *N Engl J Med.* 2016. doi:10.1056/NEJMoa1603694 427  
428  
429
11. Manley BJ, Owen LS, Doyle LW, et al. High-flow nasal cannulae in very preterm infants after extubation. *N Engl J Med.* 2013. doi:10.1056/NEJMoa1300071 430  
431  
432
12. Lemyre B, Laughon M, Bose C, Davis PG. Early nasal intermittent positive pressure ventilation (NIPPV) versus early nasal continuous positive airway pressure (NCPAP) for preterm infants. *Cochrane Database Syst Rev.* 2016. doi:10.1002/14651858.CD005384.pub2 433  
434  
435  
436

13. Lemyre B, Davis PG, De Paoli AG, Kirpalani H. Nasal intermittent positive 437  
pressure ventilation (NIPPV) versus nasal continuous positive airway 438  
pressure (NCPAP) for preterm neonates after extubation. *Cochrane* 439  
*Database Syst Rev.* 2017. doi:10.1002/14651858.CD003212.pub3 440
14. Perlman JM, Wyllie J, Kattwinkel J, et al. Part 7: Neonatal resuscitation: 441  
2015 international consensus on cardiopulmonary resuscitation and 442  
emergency cardiovascular care science with treatment 443  
recommendations. *Circulation.* 2015. 444  
doi:10.1161/CIR.0000000000000276 445
15. Lavizzari A, Colnaghi M, Ciuffini F, et al. Heated, Humidified High-Flow 446  
Nasal Cannula vs Nasal Continuous Positive Airway Pressure for 447  
Respiratory Distress Syndrome of Prematurity: A Randomized Clinical 448  
Noninferiority Trial (*JAMA Pediatr.* 449  
doi:10.1001/jamapediatrics.2016.1243). *JAMA Pediatr.* 2016;170(12):1228. 450  
doi:10.1001/jamapediatrics.2016.3743 451
16. Piaggio G, Elbourne DR, Pocock SJ, Evans SJW, Altman DG. Reporting of 452  
noninferiority and equivalence randomized trials: Extension of the 453  
CONSORT 2010 statement. *JAMA - J Am Med Assoc.* 2012. 454  
doi:10.1001/jama.2012.87802 455  
456
