# Supplementary material
Source: PubMed Central journal article supplement (PMC7653541)
Supplement: jamapediatr-e203579-s002.pdf [file jamapediatr-e203579-s002.pdf]

## Data Sharing Statement

Hochwald. Cannula With Long and Narrow Tubing vs Short Binasal Prongs for Noninvasive Ventilation in Preterm Infants. *JAMA Pediatr.* Published November 09, 2020. 10.1001/jamapediatrics.2020.3579

### Data

**Data available:** Yes

**Data types:** Deidentified participant data

**How to access data:** Data is available by contacting Dr. Ori Hochwald [O\\_Hochwald@RMC.gov.il](mailto:O_Hochwald@RMC.gov.il)

**When available:** With publication

### Supporting Documents

**Document types:** None

### Additional Information

**Who can access the data:** researchers whose proposed use of the data has been approved

**Types of analyses:** for any purpose

**Mechanisms of data availability:** with a signed data access agreement
